# Supplementary material
Source: PubMed Central journal article supplement (PMC8961681)
Supplement: NIHMS1783663-supplement-Appendix.pdf [file NIHMS1783663-supplement-Appendix.pdf]

## APPENDIX

**Appendix Exhibit A1.** States and years of data available for analysis of pregnancy-associated homicide for the years 2011-2019 and year of firearm prohibition policy implementation for the years 2010-2018.

| State          | Years of pregnancy-associated homicide data analyzed | Prohibition of firearm possession by persons convicted of an IPV-related misdemeanor | Relinquishment of firearm required for persons prohibited from possession due to an IPV-related misdemeanor | Prohibition of firearm possession by persons under IPV-related restraining order | Relinquishment of firearm required for persons prohibited from possession due to an IPV-related restraining order |
|----------------|------------------------------------------------------|--------------------------------------------------------------------------------------|-------------------------------------------------------------------------------------------------------------|----------------------------------------------------------------------------------|-------------------------------------------------------------------------------------------------------------------|
| Alabama        | 2016-2019                                            | 2015                                                                                 | -                                                                                                           | 2015                                                                             | -                                                                                                                 |
| Alaska         | 2014-2019                                            | -                                                                                    | -                                                                                                           | -                                                                                | -                                                                                                                 |
| Arizona        | 2011-2019                                            | -                                                                                    | -                                                                                                           | -                                                                                | -                                                                                                                 |
| Arkansas       | 2011-2019                                            | -                                                                                    | -                                                                                                           | -                                                                                | -                                                                                                                 |
| California     | 2011-2019                                            | <2010                                                                                | <2010                                                                                                       | <2010                                                                            | <2010                                                                                                             |
| Colorado       | 2015-2019                                            | 2013                                                                                 | 2013                                                                                                        | 2013                                                                             | 2013                                                                                                              |
| Connecticut    | 2011-2019                                            | <2010                                                                                | <2010                                                                                                       | <2010                                                                            | <2010                                                                                                             |
| Delaware       | 2011-2019                                            | <2010                                                                                | -                                                                                                           | <2010                                                                            | -                                                                                                                 |
| Florida        | 2011-2019                                            | -                                                                                    | -                                                                                                           | <2010                                                                            | -                                                                                                                 |
| Georgia        | 2011-2019                                            | -                                                                                    | -                                                                                                           | -                                                                                | -                                                                                                                 |
| Hawaii         | 2014-2019                                            | <2010                                                                                | <2010                                                                                                       | <2010                                                                            | <2010                                                                                                             |
| Idaho          | 2011-2019                                            | -                                                                                    | -                                                                                                           | -                                                                                | -                                                                                                                 |
| Illinois       | 2011-2019                                            | <2010                                                                                | 2013                                                                                                        | <2010                                                                            | <2010                                                                                                             |
| Indiana        | 2011-2019                                            | <2010                                                                                | -                                                                                                           | -                                                                                | -                                                                                                                 |
| Iowa           | 2011-2019                                            | 2010                                                                                 | 2010                                                                                                        | 2010                                                                             | 2010                                                                                                              |
| Kansas         | 2011-2019                                            | -                                                                                    | -                                                                                                           | 2018                                                                             | -                                                                                                                 |
| Kentucky       | 2011-2019                                            | -                                                                                    | -                                                                                                           | -                                                                                | -                                                                                                                 |
| Louisiana      | 2013-2019                                            | 2014                                                                                 | 2018                                                                                                        | 2014                                                                             | 2018                                                                                                              |
| Maine          | 2011-2019                                            | 2015                                                                                 | -                                                                                                           | <2010                                                                            | -                                                                                                                 |
| Maryland       | 2011-2019                                            | <2010                                                                                | 2018                                                                                                        | <2010                                                                            | <2010                                                                                                             |
| Massachusetts  | 2015-2019                                            | <2010                                                                                | <2010                                                                                                       | <2010                                                                            | <2010                                                                                                             |
| Michigan       | 2011-2019                                            | -                                                                                    | -                                                                                                           | -                                                                                | -                                                                                                                 |
| Minnesota      | 2012-2019                                            | <2010                                                                                | <2010                                                                                                       | 2014                                                                             | 2014                                                                                                              |
| Mississippi    | 2012-2019                                            | -                                                                                    | -                                                                                                           | -                                                                                | -                                                                                                                 |
| Missouri       | 2012-2019                                            | -                                                                                    | -                                                                                                           | -                                                                                | -                                                                                                                 |
| Montana        | 2011-2019                                            | -                                                                                    | -                                                                                                           | -                                                                                | -                                                                                                                 |
| Nebraska       | 2011-2019                                            | <2010                                                                                | -                                                                                                           | -                                                                                | -                                                                                                                 |
| Nevada         | 2011-2019                                            | 2015                                                                                 | 2017                                                                                                        | 2015                                                                             | -                                                                                                                 |
| New Hampshire  | 2011-2019                                            | -                                                                                    | -                                                                                                           | <2010                                                                            | <2010                                                                                                             |
| New Jersey     | 2011-2019                                            | <2010                                                                                | 2017                                                                                                        | <2010                                                                            | 2017                                                                                                              |
| New Mexico     | 2011-2019                                            | -                                                                                    | -                                                                                                           | -                                                                                | -                                                                                                                 |
| New York       | 2011-2019                                            | <2010                                                                                | 2014                                                                                                        | <2010                                                                            | <2010                                                                                                             |
| North Carolina | 2014-2019                                            | -                                                                                    | -                                                                                                           | <2010                                                                            | <2010                                                                                                             |
| North Dakota   | 2011-2019                                            | -                                                                                    | -                                                                                                           | -                                                                                | -                                                                                                                 |
| Ohio           | 2011-2019                                            | -                                                                                    | -                                                                                                           | -                                                                                | -                                                                                                                 |
| Oklahoma       | 2011-2019                                            | -                                                                                    | -                                                                                                           | -                                                                                | -                                                                                                                 |

|                |           |       |       |       |       |
|----------------|-----------|-------|-------|-------|-------|
| Oregon         | 2011-2019 | 2016  | -     | 2016  | -     |
| Pennsylvania   | 2012-2019 | <2010 | <2010 | 2018  | 2018  |
| Rhode Island   | 2011-2019 | 2017  | 2017  | 2017  | 2017  |
| South Carolina | 2011-2019 | -     | -     | -     | -     |
| South Dakota   | 2011-2019 | <2010 | -     | -     | -     |
| Tennessee      | 2012-2019 | <2010 | <2010 | <2010 | <2010 |
| Texas          | 2011-2019 | <2010 | -     | <2010 | -     |
| Utah           | 2011-2019 | 2017  | -     | 2017  | -     |
| Vermont        | 2011-2019 | 2015  | -     | -     | -     |
| Virginia       | 2015-2019 | -     | -     | 2016  | -     |
| Washington     | 2011-2019 | <2010 | -     | <2010 | <2010 |
| West Virginia  | 2018-2019 | <2010 | -     | <2010 | -     |
| Wisconsin      | 2014-2019 | -     | -     | <2010 | <2010 |
| Wyoming        | 2011-2019 | -     | -     | -     | -     |

SOURCE: Dates of death record pregnancy checkbox implementation for pregnancy-associated homicide are from Hoyert DL, Uddin SFG, Miniño AM. Evaluation of the pregnancy status checkbox on the identification of maternal deaths. National Vital Statistics Reports; vol 69 no 1. Hyattsville, MD: National Center for Health Statistics. 2020. State legislation dates are from legal review.

**Appendix Exhibit A2.** Relative impacts of firearm prohibition laws on pregnancy-associated homicide (all cases), US 2011-2019.

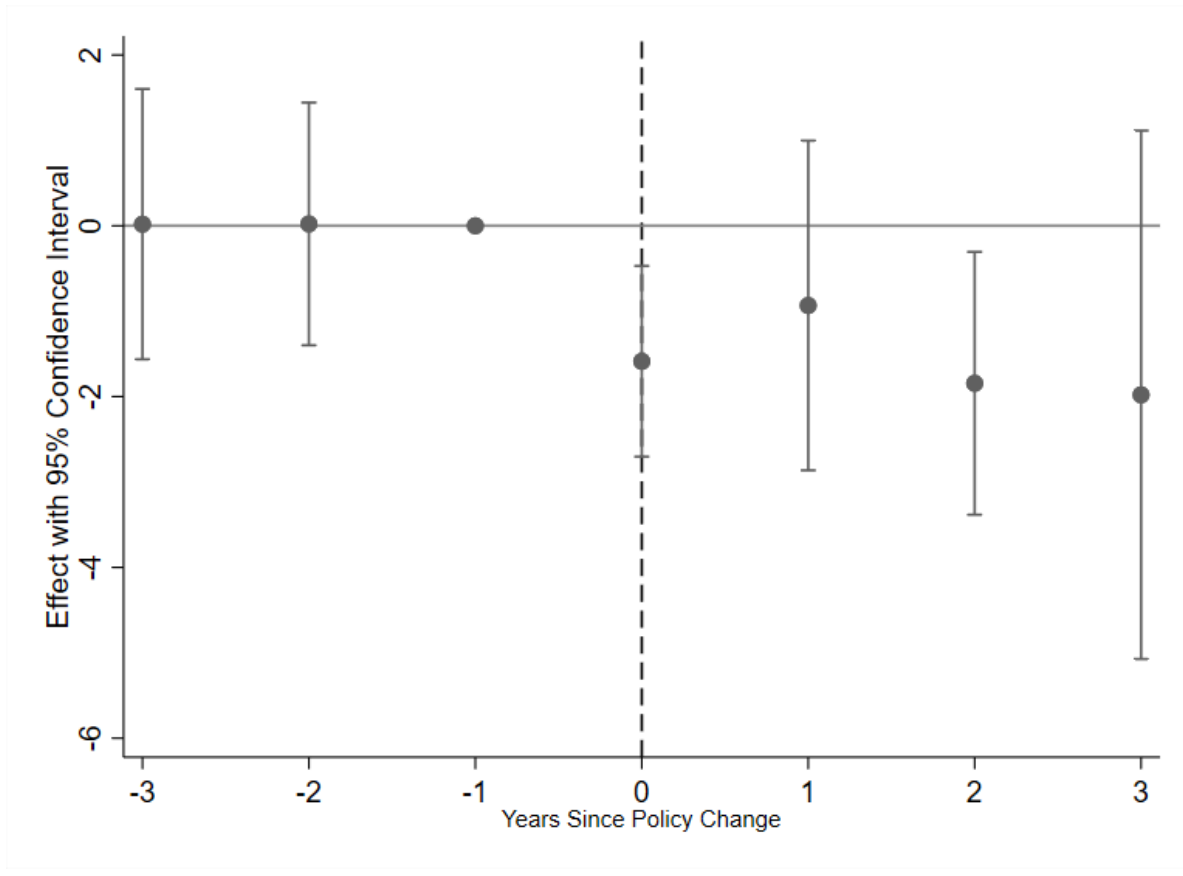

SOURCE: Author's analysis of pregnancy-associated homicide mortality data from the National Center for Health Statistics and state legislation dates from legal review. NOTES: Figure shows relative time impacts of state laws that require relinquishment of firearms when convicted of a domestic violence-related misdemeanor on pregnancy-associated homicide (deaths per 100,000 live births). All data are from a single regression where the omitted category is the year before each state passes the legislation. Point estimates from a single regression are shown as dots and 95% confidence intervals based on Huber-White cluster-robust standard errors at the state level are shown as whiskers.

**Appendix EXHIBIT A3.** Placebo test for associations between state firearm prohibition policies (2010-2018) and pneumonia mortality (deaths per 100,000 live births).

| Firearm law                                                                                                 | Pneumonia mortality <sup>a</sup> |      |
|-------------------------------------------------------------------------------------------------------------|----------------------------------|------|
|                                                                                                             | Beta (95% CI)                    | P    |
| <b>Prohibition of firearm possession by persons convicted of an IPV-related misdemeanor<sup>b</sup></b>     |                                  |      |
| Relinquishment not required                                                                                 | -0.20 (-1.23, 0.83)              | 0.70 |
| Relinquishment required                                                                                     | -0.06 (-1.61, 1.49)              | 0.94 |
| <b>Prohibition of firearm possession by persons subject to an IPV-related restraining order<sup>b</sup></b> |                                  |      |
| Relinquishment not required                                                                                 | -0.74 (-1.83, 0.34)              | 0.18 |
| Relinquishment required                                                                                     | -0.63 (-1.92, 0.65)              | 0.33 |
| <b>Prohibition and surrender by persons convicted of a misdemeanor<sup>c</sup></b>                          |                                  |      |
|                                                                                                             | -0.48 (-1.00, 0.04)              | 0.07 |
| <b>Prohibition and surrender by persons subject to a restraining order<sup>c</sup></b>                      |                                  |      |
|                                                                                                             | 1.05 (-0.05, 2.14)               | 0.06 |

SOURCE: Author’s analysis of pneumonia mortality data from the National Center for Health Statistics and state legislation dates from legal review. NOTES: a. Adjusted model includes state, year, gun homicide and stranger homicide rate, state Medicaid family planning waiver, median household income, income inequality, poverty, gun ownership, percentage of births by maternal race and age during policy implementation year. c. Reference group is state years without this law. d. Reference group is state years with the possession prohibition law but no relinquishment law.
